# Supplementary material
Source: publisher site journal article supplement (https://www.dovepress.com/article/271078)
Supplement: Supplementary file 1 [file get_supplementary_file.php]

**
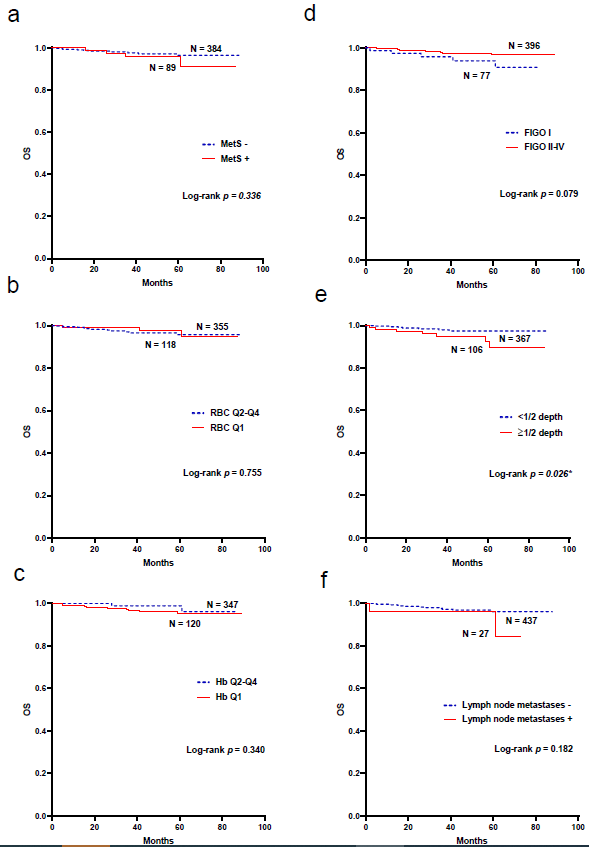
**

**Supplementary Figure 1** Kaplan-Meier analysis of survival curves for EEC patients (a-f).

Notes: *P ˂ 0.05.

Abbreviations: OS, overall survival; MetS, metabolic syndrome; FIGO, International Federation of Gynecology and Obstetrics; RBC, red blood cell count; Hb, hemoglobin. The vertical axis represents the cumulative survival rate.

**
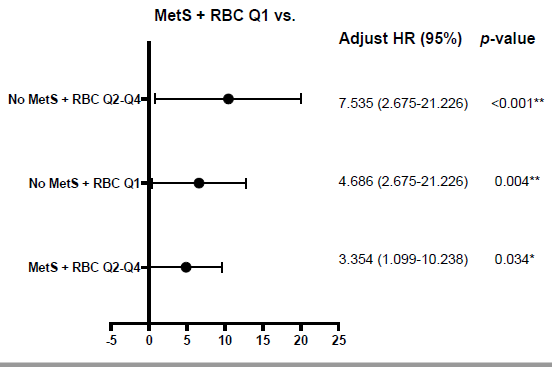
**

**Supplementary Figure 2** Risk of deep myometrial invasion in EEC patients with different MetS status and RBC quartiles.

Notes: *P ˂ 0.05; **P ˂ 0.01.

Abbreviations: MetS, metabolic syndrome; RBC, red blood cell count; Hb, hemoglobin; Q1, 1st quartile; Q2, 2nd quartile; Q3, 3rd quartile; Q4, 4th quartile; HR: hazard ratio.
